# Supplementary material for: Development and application of an integrated allele-specific pipeline for methylomic and epigenomic analysis (MEA)
Source: PubMed Central journal article supplement (PMC6003194; doi:10.1186/s12864-018-4835-2), 2018-06-15

Figure S1

a

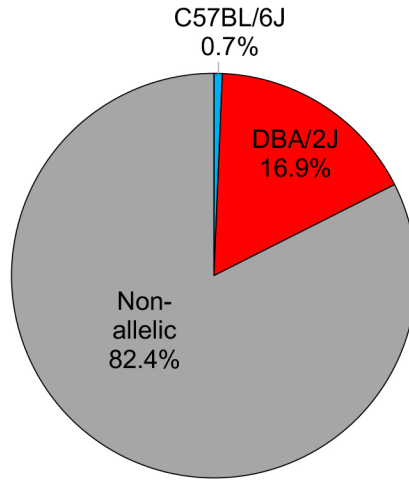

b

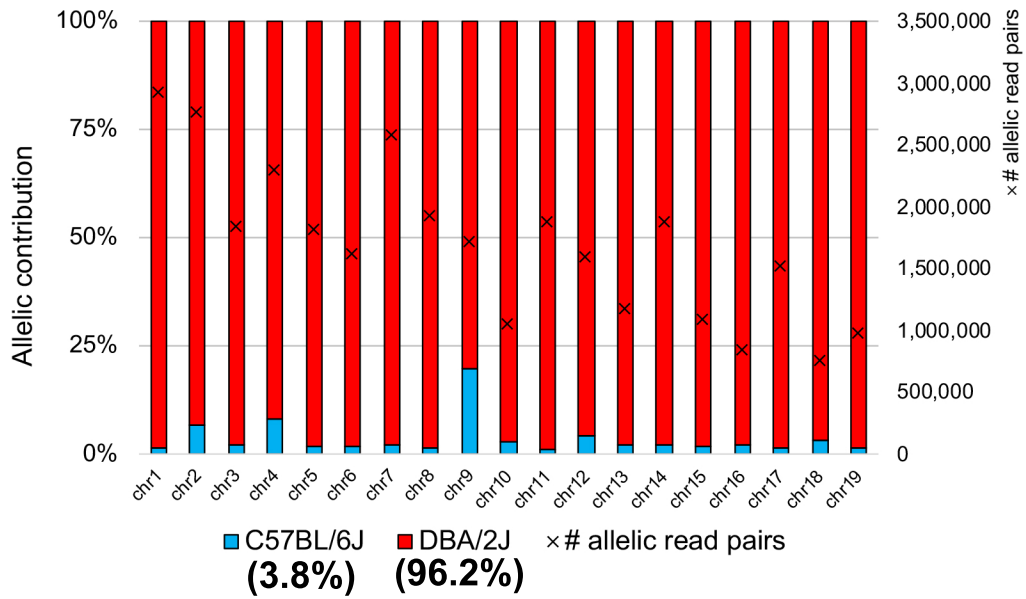

c

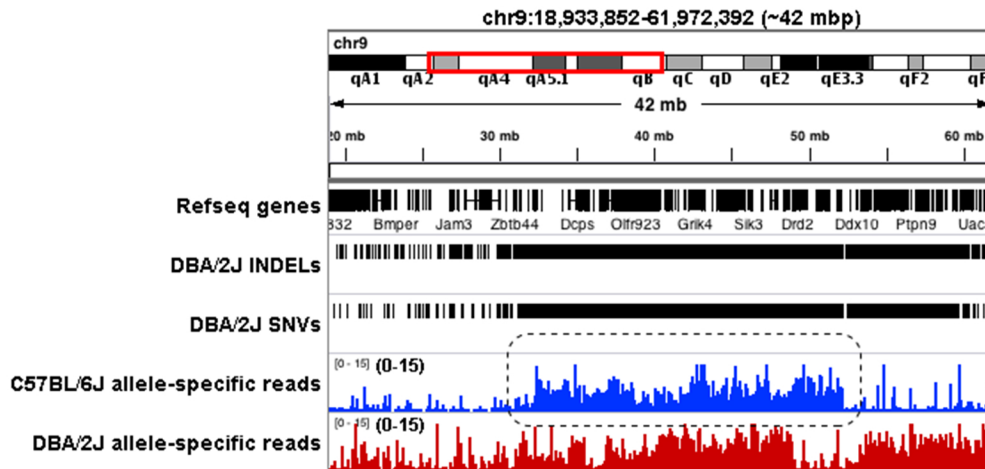

**Figure S2**

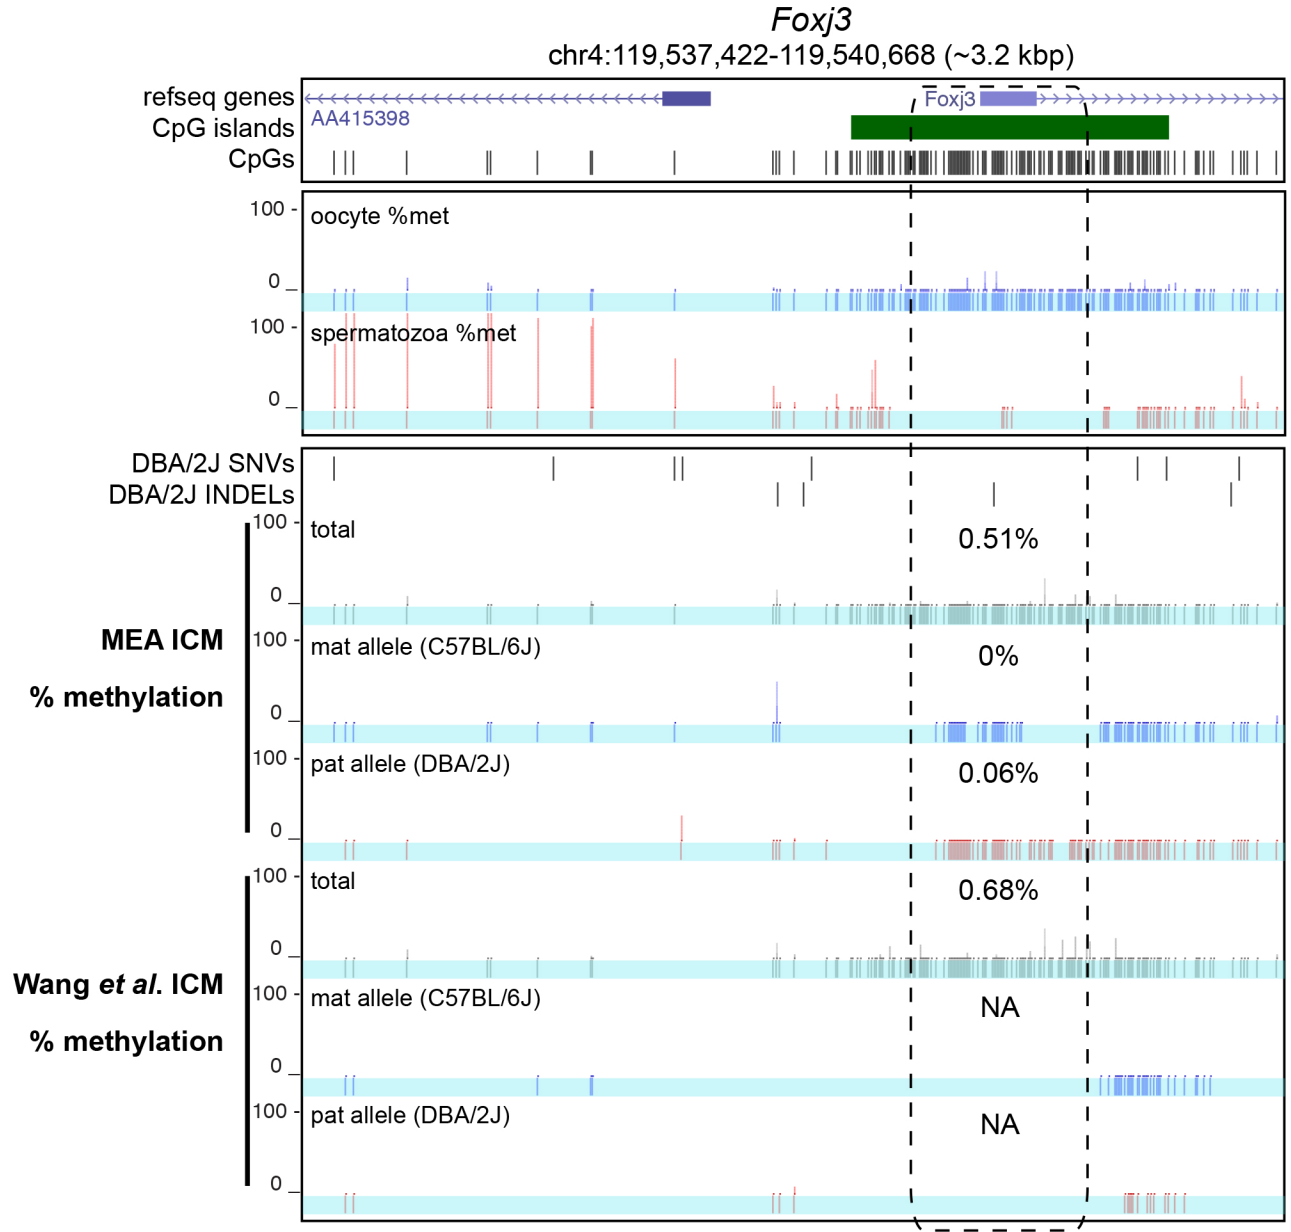

**Figure S3**

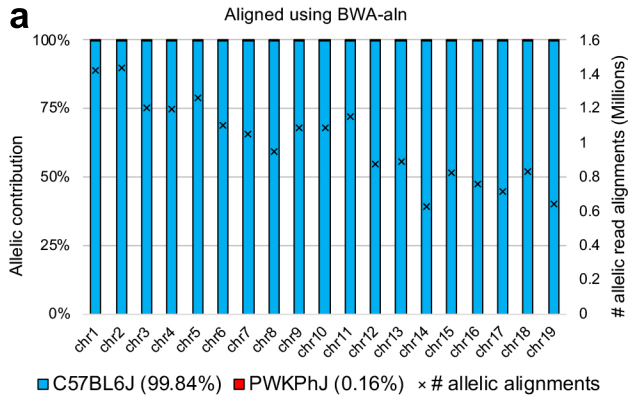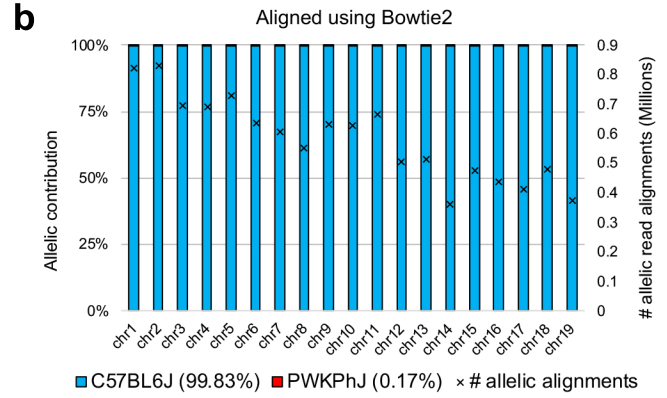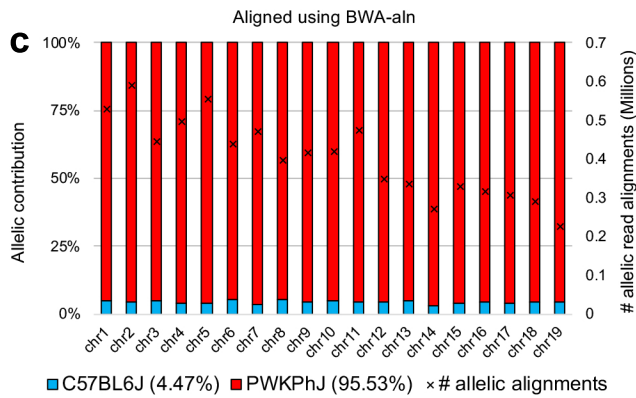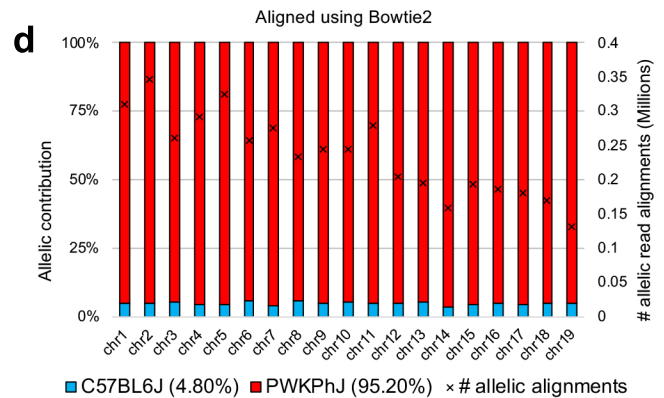

**Figure S4**

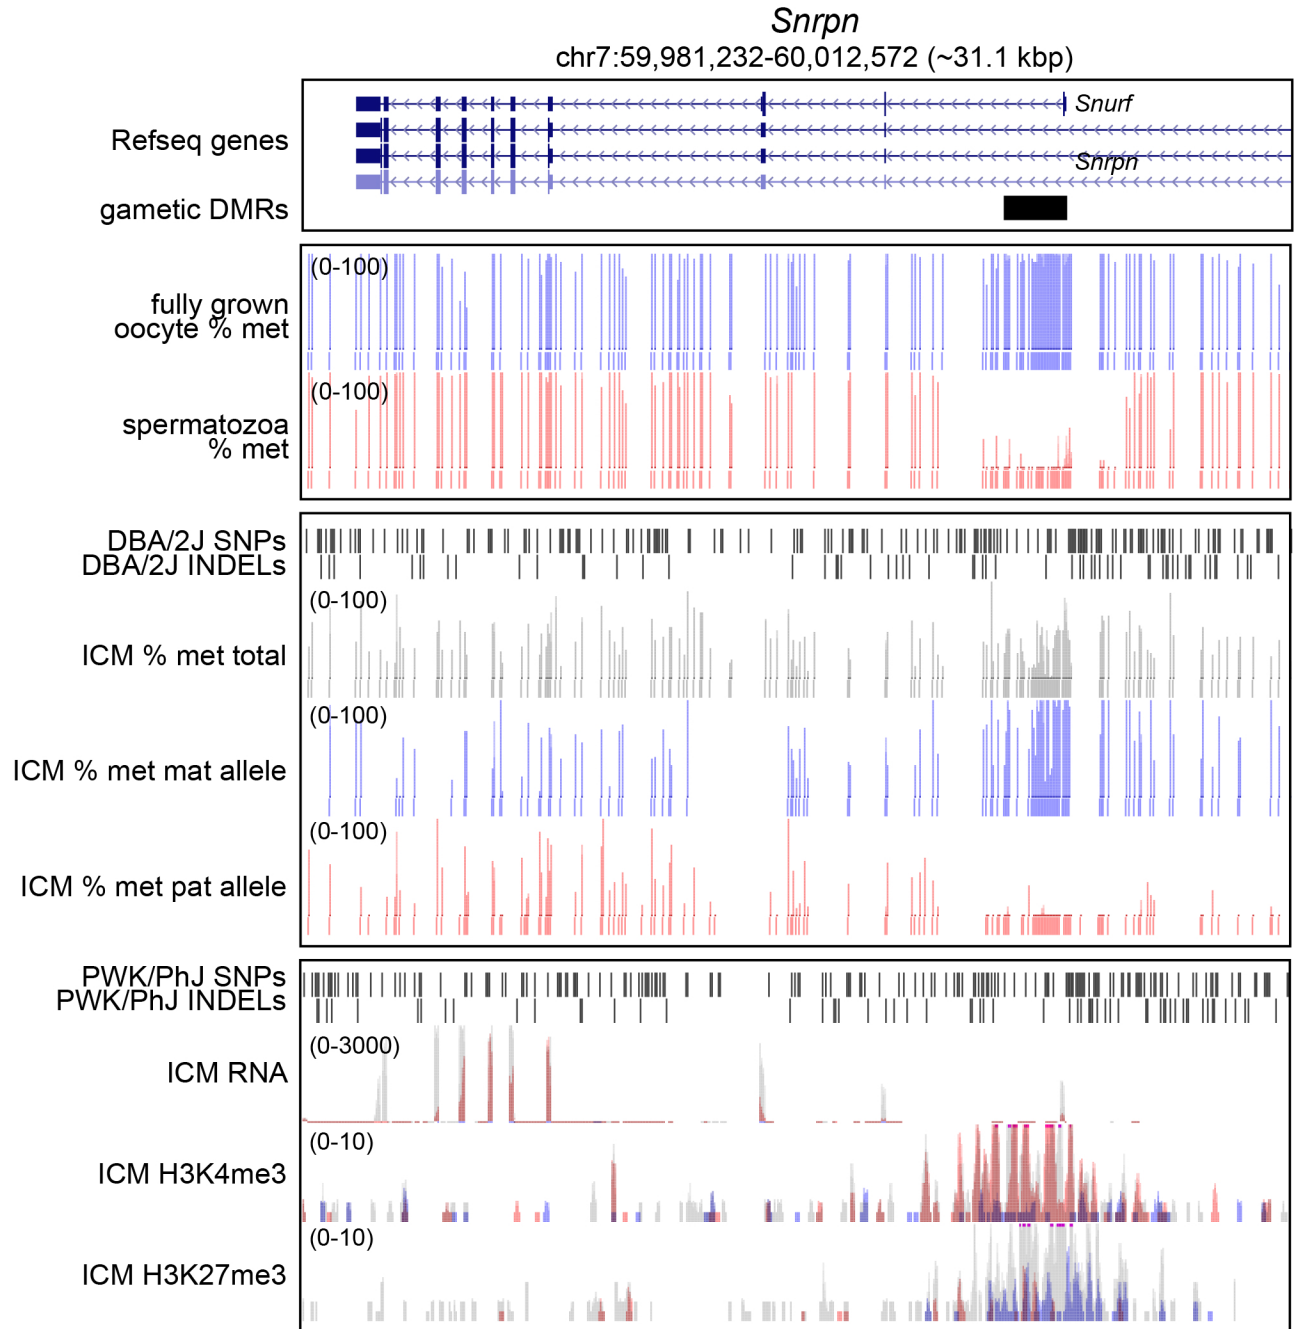

**Figure S5**

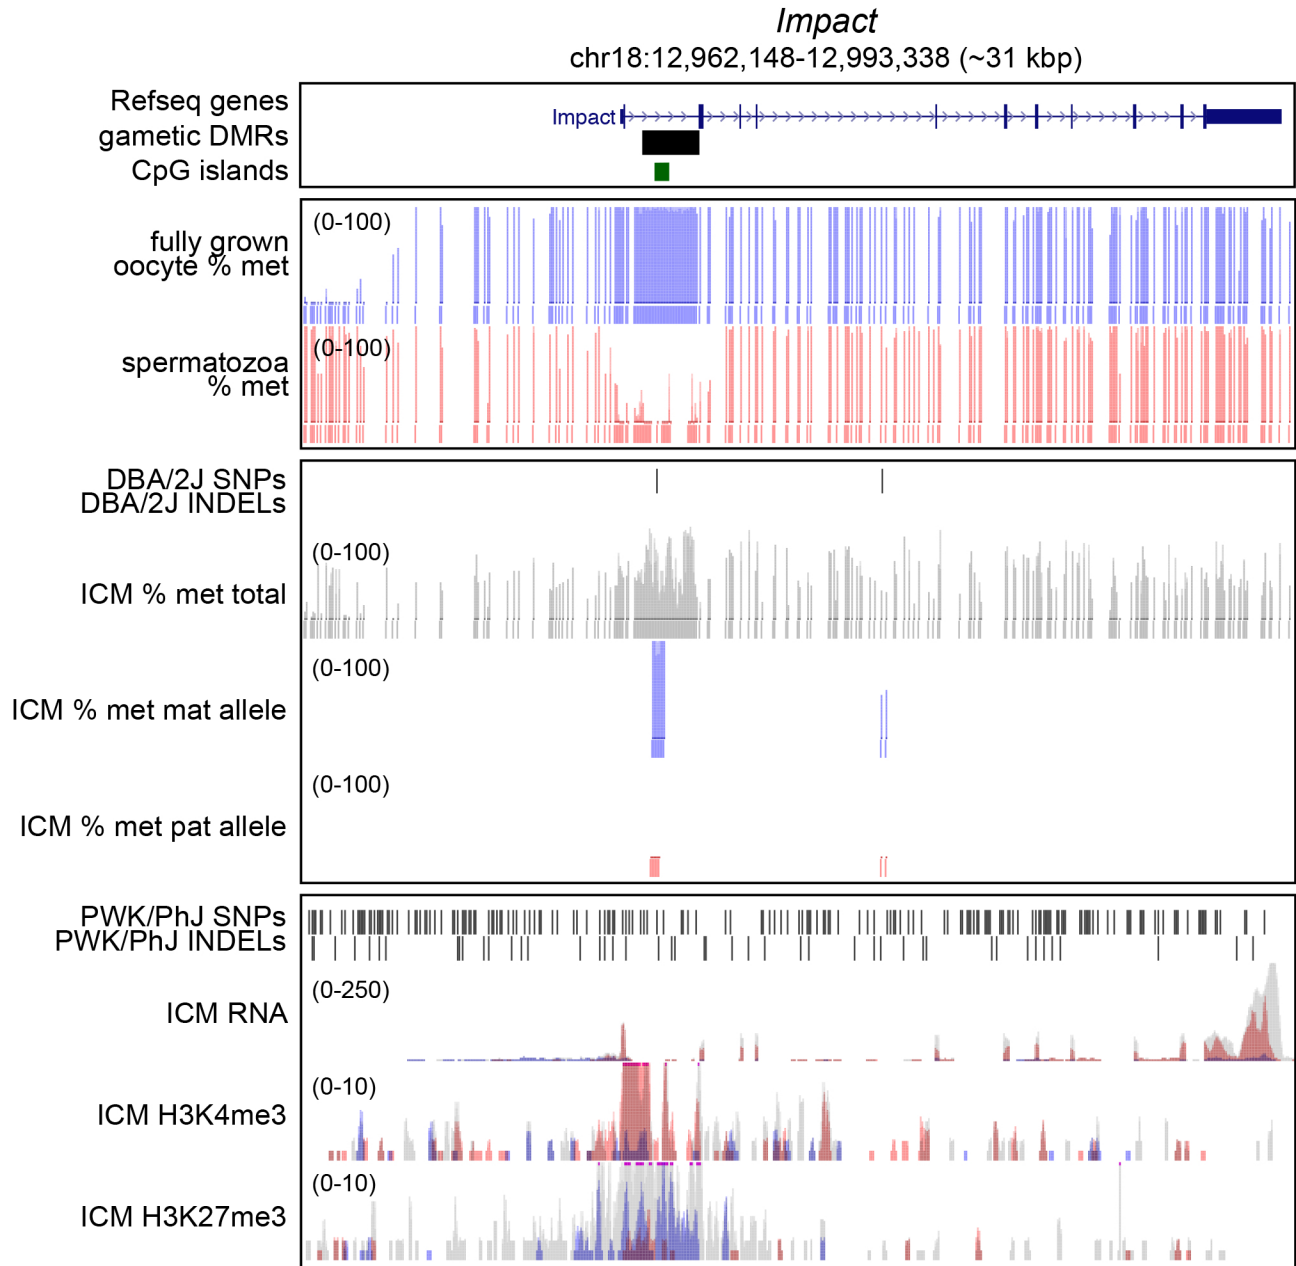

Supplement: 12864_2018_4835_MOESM1_ESM.pdf [file 12864_2018_4835_MOESM1_ESM.pdf]
